# Supplementary material
Source: PubMed Central journal article supplement (PMC3145917)

# A Snowdrift Game

|      |   | Symbiont |       |
|------|---|----------|-------|
|      |   | C        | D     |
| Host | C | (2,2)    | (1,3) |
|      | D | (3,1)    | (0,0) |

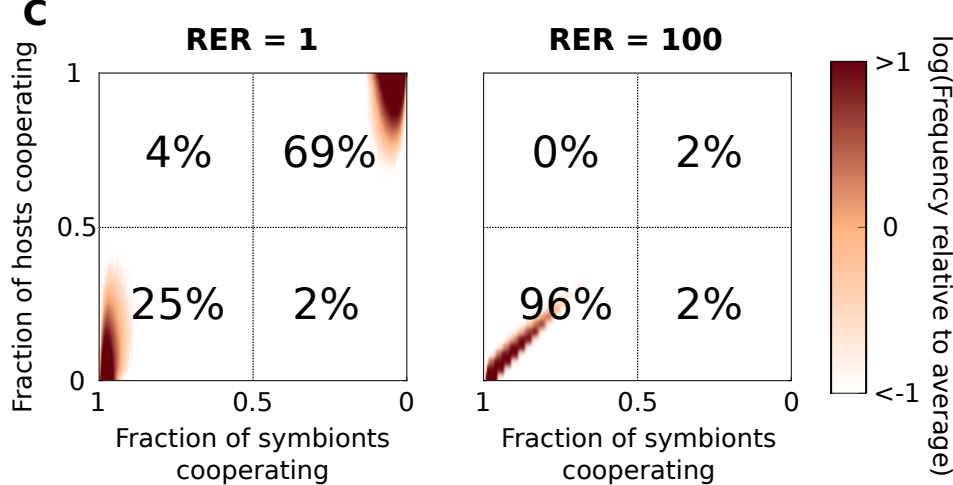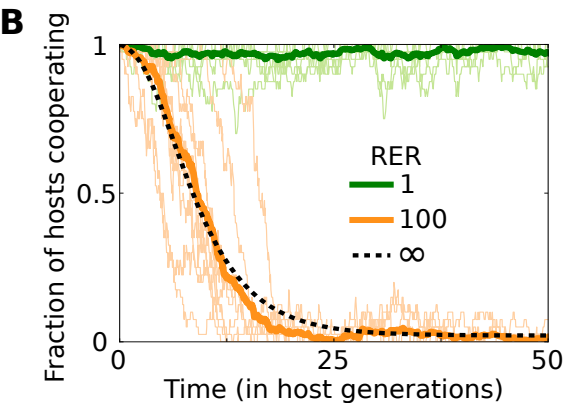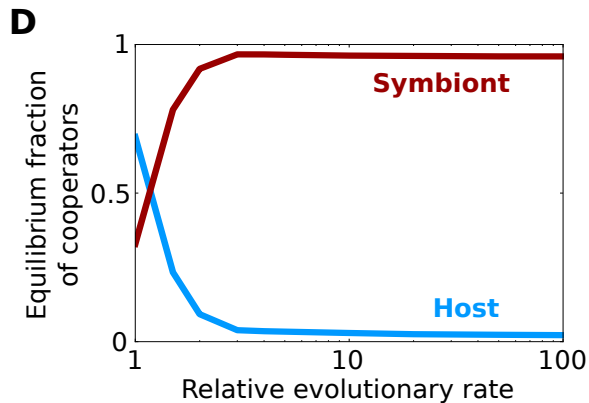

Supplement: NIHMS287684-supplement-Supp_Figure_S1-S4.pdf [file NIHMS287684-supplement-Supp_Figure_S1-S4.pdf]
